# Supplementary material
Source: PubMed Central journal article supplement (PMC5448166)
Supplement: pnas.1616572114.sapp.pdf [file pnas.1616572114.sapp.pdf]

## **Text S1. Description of Macro-Level Indices Used in Study 1**

Indices were included based on their relevance (i.e., measuring socio-political functioning and inequality), comprehensiveness (i.e., quantity of sub-indicators or algorithmic complexity), credibility (i.e., provided by established institutions, organizations or think tanks) and availability (i.e., that data collected at the same time point was available for most countries).

### **Absence of Governance**

Based on 32 individual sources of data obtained from NGOs, think tanks, surveys and private sector evaluations, the World Bank rates the governance of all countries in the World. When assessing a country's degree of governance, the World Bank distinguishes between six different facets, namely *voice and accountability*, *political stability and absence of violence*, *government effectiveness*, *regulatory quality*, *rule of law* and *control of corruption*. To increase comparability with the other indices, we reversed-scored all indicators so that higher values represented *less* favorable evaluations of governance in a country. Next, we calculated a general governance index on the basis of these sub indicators ( $\alpha = .98$ ). The latest 2014 data available for each country for which we had SDO scores were used.

### **Risk of Violent Conflicts**

We used the Fragile States Index annually published by the non-profit organization Fund for Peace to gather an overall rating of countries' risk of political conflict and its susceptibility to failure. The index is based on data obtained through algorithm-based content analyses of millions of political, social and economic documents and can further be distinguished into twelve subscales including *demographic pressures*, *refugees and IDPs*, *group grievance*, *human flight and brain drain*, *uneven economic development*, *poverty and economic decline*, *state illegitimacy*, *public services*, *human rights and rule of law*, *security*

*apparatus, factionalized elites and external intervention*. All sub-indicators range from 1 (*lowest or most favorable value*) to 10 (*highest or least favorable score*), while the composite index ( $\alpha = .98$ ) has a minimum value of 12 indicating absence of risk or state failure and 120 representing full state failure or high alert. We used the most recent 2015 version of the index that provided data for all countries except Taiwan.

### **Absence of Democracy**

The democracy index provided by the Economist Intelligence Unit was used to measure countries' states of democracy based on expert opinions and advanced scoring systems supplemented by surveys. It provides a general index comprising the subscales *electoral process, functioning of government, political participation, political culture, and civil liberties*. Each indicator and the final index ( $\alpha = .96$ ) was reversed scored to increase comparability so that scores ranged from 0 (*perfect democracy*) to 10 (*absence of democracy*). We used the most recent 2015 version of the index providing data for all countries.

### **Absence of Press Freedom**

The 2015 press freedom data published by Reporters without Borders was used. The index is, beside other factors, calculated on the basis of violence against journalists and evaluations by press organizations, journalists and correspondents across the world. A score of 0 represents perfect press freedom while a score of 100 represents total absence of press freedom.

### **Happiness Inequality**

In the most recent 2016 World Happiness Report, a new measure of *happiness inequality* was introduced. This measure provides a broader measure of inequality than classic economic measures by using the standard deviation of reported happiness in a country to assess happiness inequality. Data for all countries was available.

## **Gender Inequality**

The Gender Inequality Index provided by the United Nations Development Program was used. It is based on the indicators *maternal mortality rate*, *adolescent birth rate per thousand women*, *seats in parliament held by women*, *male and female population with secondary education* and their *labor force participation rate*. Values on the index can range between 0 (*no inequality*) to 1 (*extreme inequality*). The most recent 2014 gender inequality index was used providing data for each country except Taiwan, which is not covered by the index.

## **Absence of Social Progress**

The Social Progress Index provided by the Social Progress Imperative was used as a multi-dimensional measure of societies' capacity to satisfy their citizens' basic human needs, to sustain their quality of life and to create conditions that allow them to reach their potential. The index is based on four basic *human needs* indicators (i.e., nutrition and medical care, water and sanitation, shelter, personal safety), four *well-being* indicators (i.e., access to basic knowledge, access to information and communications, health and wellness, ecosystem sustainability) and four *opportunity markers* (i.e., personal rights, personal freedom and choice, tolerance and inclusion, access to advanced education). To increase comparability, we reverse-scored estimates on the main index ( $\alpha = .96$ ) so that values ranged from 0 (*very high social progress*) to 100 (*absence of social progress*). We used the 2015 data that provided values for each country except Taiwan.

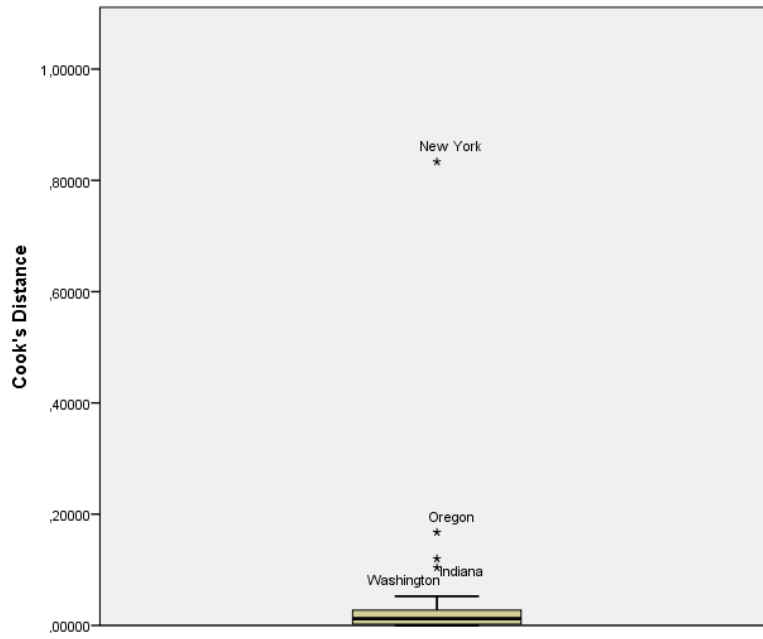

*Fig. S1.* Multivariate outlier analysis for the SDO-Gini relationship in Study 2 is displayed.

**Table S1***Indices used in the Study 1*

| Name                         | Publisher                                 | Year      | Countries                                                                                                                                                                                                                                                                 | Source                                                                                                                                                                                                                                        |
|------------------------------|-------------------------------------------|-----------|---------------------------------------------------------------------------------------------------------------------------------------------------------------------------------------------------------------------------------------------------------------------------|-----------------------------------------------------------------------------------------------------------------------------------------------------------------------------------------------------------------------------------------------|
| Social Dominance Orientation | Meta-study                                | 1996-2009 | Australia, Belgium<br>Canada, China, France, Germany, Hungary<br>India, Israel, Italy, Japan, Lebanon, Mexico,<br>Netherlands, New Zealand, Pakistan, Poland,<br>Romania, Russia, Serbia & Montenegro, South<br>Africa, Spain, Sweden, Switzerland<br>Taiwan, Turkey, USA | Original scores can be found at<br><a href="http://dx.doi.org/10.1111/j.1467-9221.2012.00884.x">http://dx.doi.org/10.1111/j.1467-9221.2012.00884.x</a><br>Note, however, that we used<br>country estimates for majority<br>participants only. |
| Failed States Index          | Funds for Peace                           | 2015      | All countries from meta-study except Taiwan                                                                                                                                                                                                                               | <a href="http://fsi.fundforpeace.org/rankings-2015">http://fsi.fundforpeace.org/rankings-2015</a>                                                                                                                                             |
| Governance Index             | World Bank                                | 2014      | All countries from meta-study                                                                                                                                                                                                                                             | <a href="http://info.worldbank.org/governance/wgi/index.aspx#home">http://info.worldbank.org/governance/wgi/index.aspx#home</a>                                                                                                               |
| Social Progress Index        | Social Progress Imperative                | 2015      | All countries from meta-study except Taiwan                                                                                                                                                                                                                               | <a href="http://www.socialprogressimperative.org/data/spi">http://www.socialprogressimperative.org/data/spi</a>                                                                                                                               |
| Democracy Index              | Economist Intelligence Unit               | 2015      | All countries from meta-study                                                                                                                                                                                                                                             | <a href="http://www.eiu.com/public/thankyou_download.aspx?activity=download&amp;campaignid=DemocracyIndex2015">http://www.eiu.com/public/thankyou_download.aspx?activity=download&amp;campaignid=DemocracyIndex2015</a>                       |
| World Press Freedom Index    | Reporters without Borders                 | 2015      | All countries from meta-study                                                                                                                                                                                                                                             | <a href="http://index.rsf.org/#!/index-details">http://index.rsf.org/#!/index-details</a>                                                                                                                                                     |
| Happiness Inequality Index   | Sustainable Development Solutions Network | 2016      | All countries from meta-study                                                                                                                                                                                                                                             | <a href="http://worldhappiness.report/wp-content/uploads/sites/2/2016/03/Online-data-for-chapter-2-whr-2016.xlsx">http://worldhappiness.report/wp-content/uploads/sites/2/2016/03/Online-data-for-chapter-2-whr-2016.xlsx</a>                 |
| Gender Inequality Index      | United Nations                            | 2014      | All countries from meta-study except Taiwan                                                                                                                                                                                                                               | <a href="http://hdr.undp.org/en/composite/GII">http://hdr.undp.org/en/composite/GII</a>                                                                                                                                                       |

Note. Data for Serbia and Montenegro was mean-scored.

## Text S2. Outlier Analyses Based on Cook's Distance for the Relationship between SDO and the Different Indices in Study 1

### Failed States Index

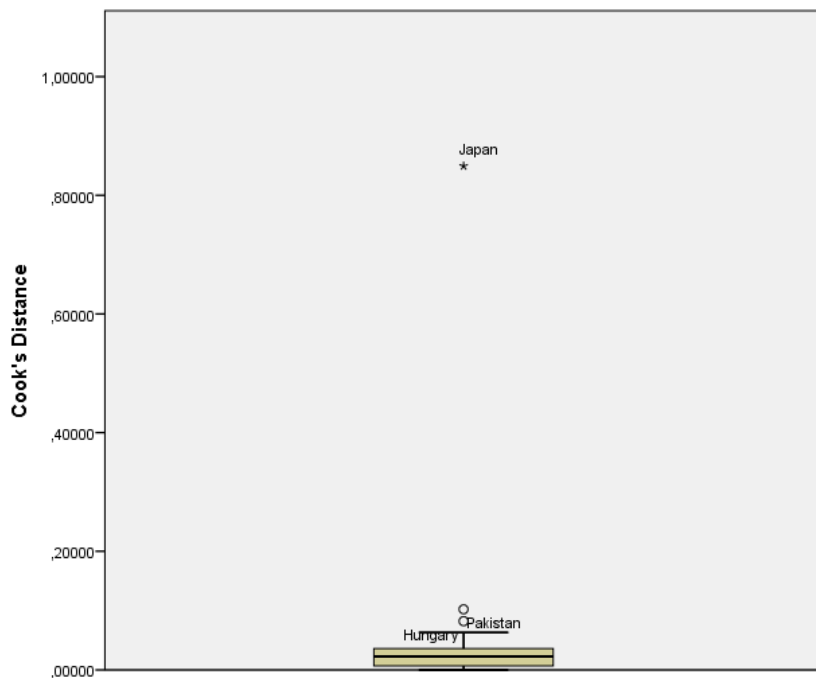

Please see Table S2 for the correlation coefficients excluding Japan. Please see Table S3 for the correlation coefficients excluding Japan, Pakistan and Hungary.

## Governance Index

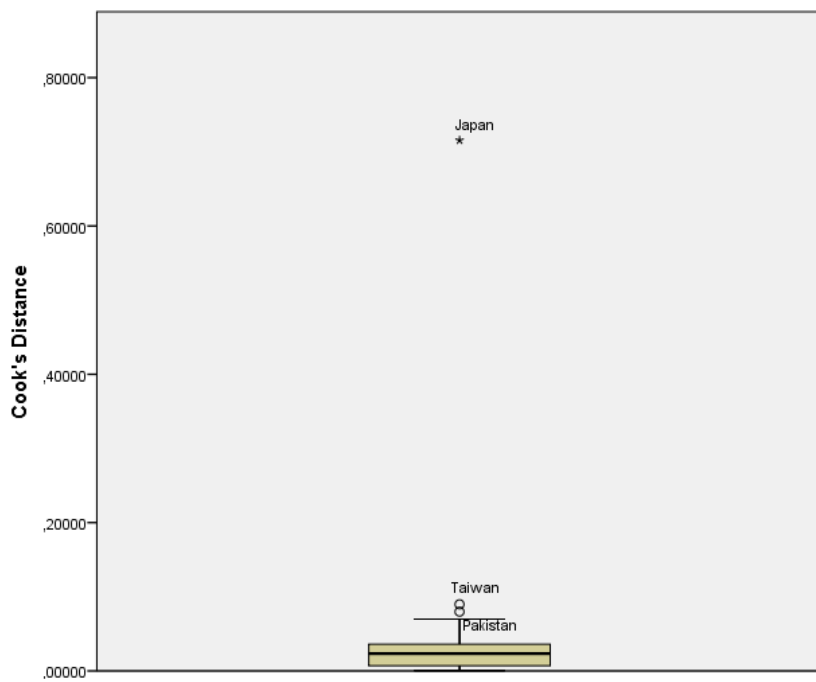

Please see Table S2 for the correlation coefficients excluding Japan. Please see Table S3 for the correlation coefficients excluding Japan, Taiwan and Pakistan.

### Social Progress Index

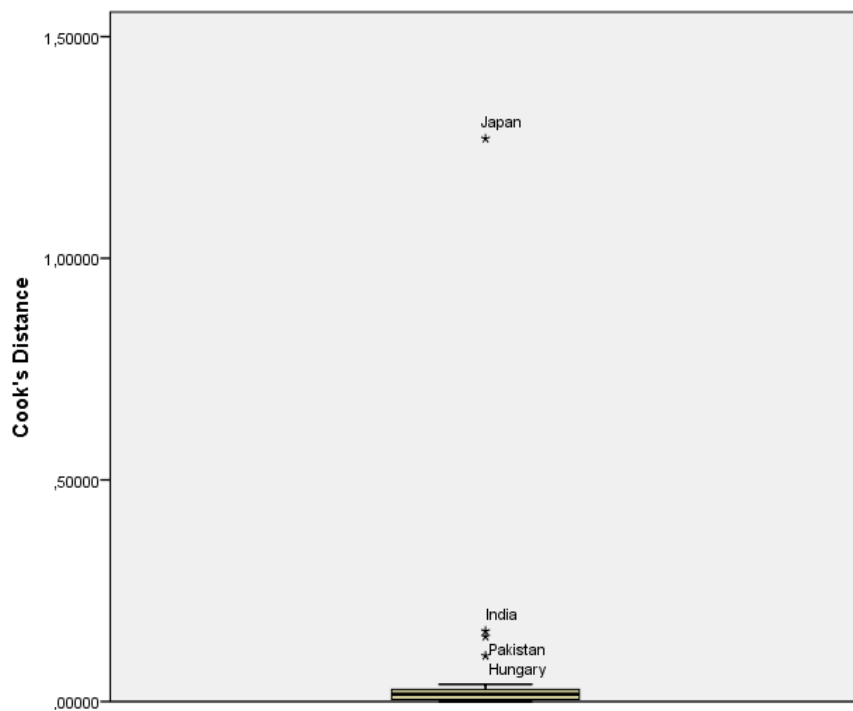

Please see Table S2 and S3 for the correlation coefficients excluding Japan, India, Pakistan and Hungary.



**Democracy Index**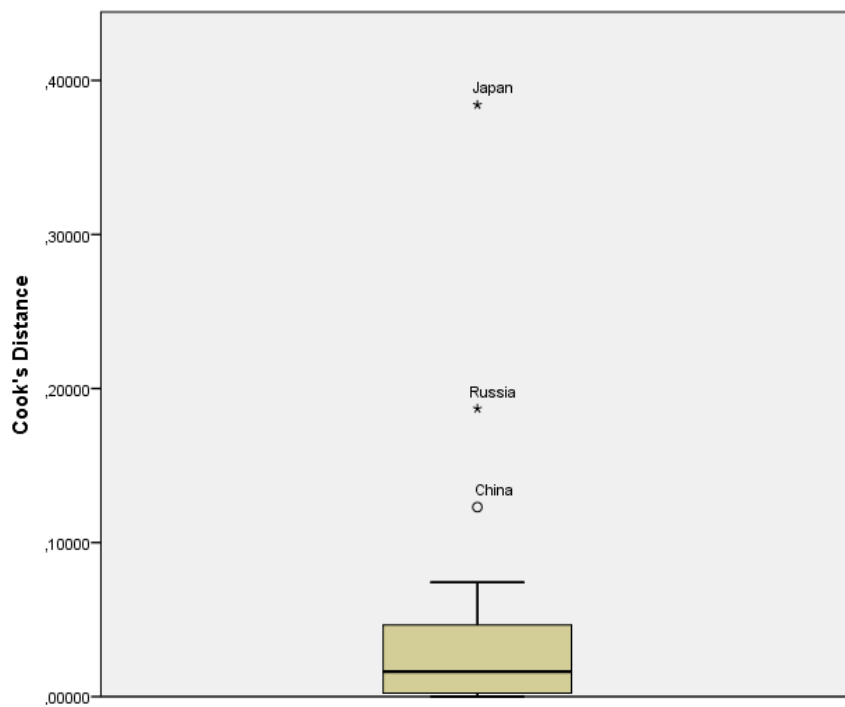

Please see Table S2 for the correlation coefficients excluding Japan and Russia. Please see Table S3 for the correlation coefficients excluding Japan, Russian and China.

## Press Freedom Index

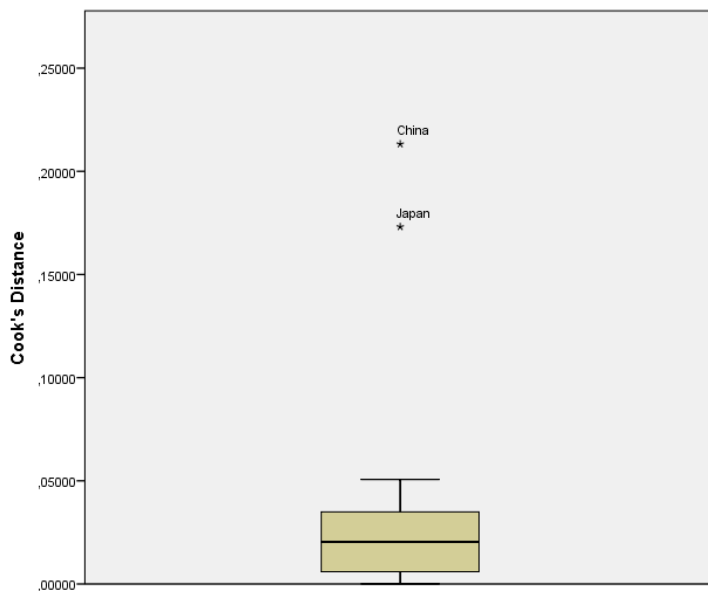

Please see Table S2 and S3 for the correlation coefficients excluding China and Japan.

## Gender Inequality Index

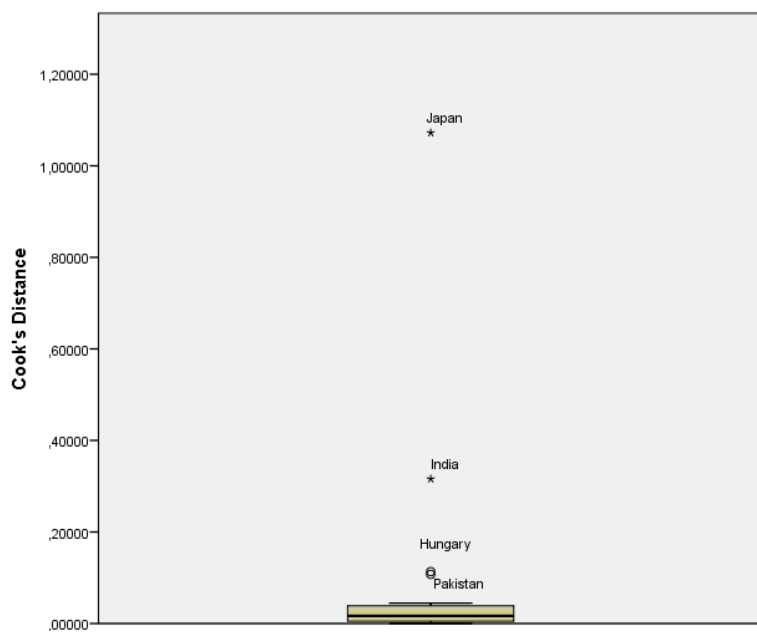

Please see Table S2 for the correlation coefficients excluding Japan and India. Please see Table S3 for the correlation coefficients excluding Japan, India, Hungary and Pakistan.

## Happiness Inequality Index

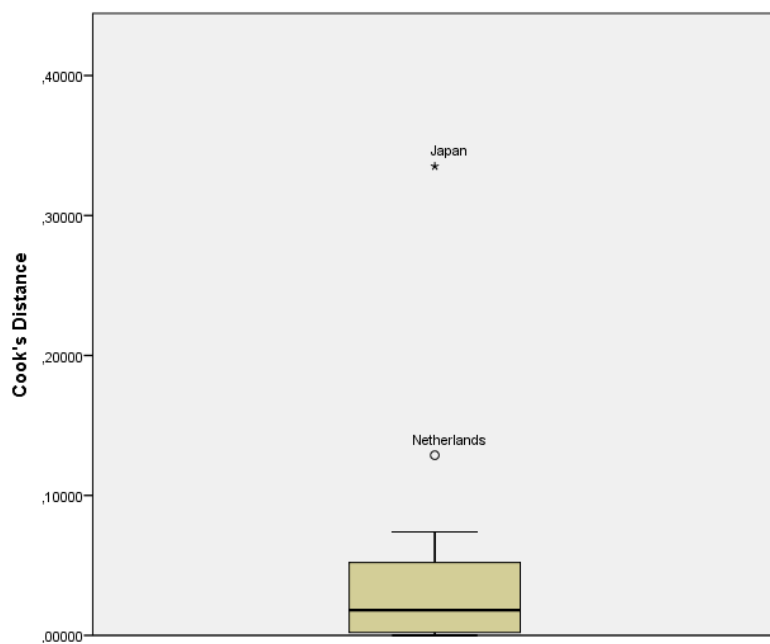

Please see Table S2 for the correlation coefficients excluding Japan. Please see Table S3 for the correlation coefficients excluding Japan and the Netherlands.

Table S2

*Correlations between Country-Level Social Dominance and Social and Political Indices in Study 1 when Extreme Outliers are Deleted based on Cook's distance*

|                            | <i>r</i> | <i>p</i> | 95% LLCI | 95% ULCI |
|----------------------------|----------|----------|----------|----------|
| Risk of Violent Conflicts  | .52      | .001     | .279     | .735     |
| Absence of Governance      | .49      | .001     | .231     | .730     |
| Absence of Social Progress | .67      | <.001    | .472     | .819     |
| Absence of Democracy       | .36      | .004     | .144     | .611     |
| Absence of Press Freedom   | .42      | .005     | .150     | .663     |
| Gender Inequality          | .50      | .001     | .277     | .745     |
| Happiness Inequality       | .45      | <.001    | .230     | .647     |

*Note.* Two-tailed *p*-values and 95% Confidence Intervals are based on bootstrapping with 5000 resamples.

Table S3

*Correlations between Country-Level Social Dominance and Social and Political Indices in Study 1 when Extreme and Moderate Outliers are Deleted based on Cook's distance*

|                            | <i>r</i> | <i>p</i> | 95% LLCI | 95% ULCI |
|----------------------------|----------|----------|----------|----------|
| Risk of Violent Conflicts  | .62      | <.001    | .378     | .803     |
| Absence of Governance      | .59      | <.001    | .366     | .790     |
| Absence of Social Progress | .67      | <.001    | .472     | .819     |
| Absence of Democracy       | .36      | .005     | .135     | .625     |
| Absence of Press Freedom   | .42      | .005     | .150     | .663     |
| Gender Inequality          | .60      | <.001    | .355     | .807     |
| Happiness Inequality       | .43      | .003     | .168     | .650     |

*Note.* Two-tailed *p*-values and 95% Confidence Intervals are based on bootstrapping with 5000 resamples.

Table S4.

*Descriptive Statistics, Mean Social Dominance, Reliability Coefficients and rwg(j) Index of Agreement for U.S. States*

| US State      | N   | Age  |      | Gender |       | Social Dominance |      |      |        |
|---------------|-----|------|------|--------|-------|------------------|------|------|--------|
|               |     | M    | (SD) | Men    | Women | $\alpha$         | M    | (SD) | rwg(j) |
| Alabama       | 156 | 35.3 | 11.5 | 38.5%  | 60.9% | .945             | 2.53 | 1.22 | 0.88   |
| Arizona       | 172 | 36.7 | 12.9 | 41.3%  | 57.6% | .947             | 2.42 | 1.16 | 0.91   |
| California    | 131 | 34.8 | 13.4 | 42.7%  | 57.3% | .949             | 2.49 | 1.26 | 0.87   |
| Colorado      | 174 | 34.7 | 12.0 | 36.8%  | 62.1% | .959             | 2.35 | 1.21 | 0.92   |
| Connecticut   | 101 | 33.2 | 10.6 | 39.6%  | 60.4% | .954             | 2.45 | 1.16 | 0.92   |
| Florida       | 175 | 38.4 | 13.8 | 33.7%  | 65.7% | .954             | 2.59 | 1.24 | 0.90   |
| Georgia       | 133 | 34.2 | 10.7 | 36.8%  | 63.2% | .949             | 2.46 | 1.24 | 0.88   |
| Illinois      | 164 | 35.5 | 12.8 | 39.6%  | 56.7% | .962             | 2.51 | 1.29 | 0.90   |
| Indiana       | 163 | 35.3 | 12.4 | 39.9%  | 59.5% | .953             | 2.53 | 1.19 | 0.91   |
| Iowa          | 107 | 36.2 | 12.1 | 35.5%  | 64.5% | .946             | 2.38 | 1.10 | 0.93   |
| Kentucky      | 183 | 33.9 | 11.3 | 37.2%  | 62.3% | .957             | 2.26 | 1.15 | 0.93   |
| Louisiana     | 116 | 33.6 | 9.5  | 41.4%  | 58.6% | .938             | 2.44 | 1.15 | 0.90   |
| Maryland      | 134 | 34.3 | 11.0 | 43.3%  | 56.0% | .940             | 2.30 | 1.10 | 0.92   |
| Massachusetts | 180 | 33.4 | 11.3 | 41.1%  | 58.9% | .960             | 2.53 | 1.25 | 0.90   |
| Michigan      | 168 | 35.1 | 11.5 | 41.1%  | 57.7% | .955             | 2.40 | 1.22 | 0.91   |
| Minnesota     | 182 | 33.2 | 10.7 | 44.0%  | 56.0% | .953             | 2.47 | 1.14 | 0.93   |
| Missouri      | 152 | 36.2 | 12.5 | 37.5%  | 62.5% | .945             | 2.50 | 1.20 | 0.89   |

|                |     |      |      |       |       |      |      |      |      |
|----------------|-----|------|------|-------|-------|------|------|------|------|
| New Jersey     | 138 | 36.3 | 12.0 | 46.4% | 53.6% | .949 | 2.52 | 1.14 | 0.92 |
| New York       | 143 | 35.2 | 12.5 | 42.7% | 57.3% | .959 | 2.24 | 1.08 | 0.95 |
| North Carolina | 152 | 34.5 | 11.3 | 41.4% | 58.6% | .958 | 2.47 | 1.22 | 0.91 |
| Ohio           | 174 | 34.9 | 12.1 | 33.9% | 64.9% | .948 | 2.26 | 1.09 | 0.93 |
| Oklahoma       | 107 | 34.9 | 11.1 | 43.9% | 56.1% | .953 | 2.39 | 1.20 | 0.91 |
| Oregon         | 168 | 35.0 | 10.8 | 35.7% | 64.3% | .935 | 2.07 | 0.96 | 0.95 |
| Pennsylvania   | 194 | 35.2 | 12.2 | 38.1% | 60.8% | .951 | 2.36 | 1.10 | 0.94 |
| South Carolina | 125 | 34.9 | 11.1 | 33.6% | 66.4% | .963 | 2.40 | 1.29 | 0.90 |
| Tennessee      | 182 | 35.2 | 11.6 | 34.1% | 65.9% | .957 | 2.57 | 1.28 | 0.88 |
| Texas          | 156 | 35.9 | 13.0 | 31.4% | 67.9% | .955 | 2.51 | 1.20 | 0.92 |
| Virginia       | 147 | 36.1 | 12.2 | 41.5% | 58.5% | .949 | 2.33 | 1.12 | 0.93 |
| Washington     | 165 | 35.2 | 11.8 | 33.3% | 66.1% | .937 | 2.19 | 1.01 | 0.94 |
| Wisconsin      | 171 | 35.6 | 12.3 | 40.4% | 59.1% | .956 | 2.41 | 1.16 | 0.93 |

---

*Note.* Missing gender percentages correspond to gender response "other".

### Text S3. MPlus Syntax for Study 2

```

DATA: FILE IS "C:\ study2.dat"; ! text file containing the raw data in long format
VARIABLE: NAMES ARE
state x1 m1 m2 y1 y2 y3 y4 y5 ; ! specifies the grouping variable (state), IV (US peace
! index/Gini), mediator (m1 = SDO at individual level; m2 = aggregated SDO
! at state level), Dependent variables (labelled y1 to y5)
BETWEEN IS x1 m2 ; ! identifies variables with only Between variance (state level)
CLUSTER IS state; ! Level-2 identifier variable
MISSING ARE ALL (-999);
DEFINE: CENTER M1 (GRANDMEAN);
ANALYSIS: TYPE IS TWOLEVEL RANDOM;
MODEL: ! model specification follows

%WITHIN% ! Model for Within effects follows
m1 y1 y2 y3 y4 y5;

!Here all level 1 effects of within-state SDO on within-state DV's
y1 ON m1(b1);
y2 ON m1(b2);
y3 ON m1(b3);
y4 ON m1(b4);
y5 ON m1(b5);

%BETWEEN% ! Model for Between effects follows
X1 m2 y1 y2 y3 y4 y5 ;

m2 ON x1 (a2); ! regress gini on state-mean sdo (level 2); name this effect 'a2'
y1 ON m2(b1a);
y2 ON m2(b2a);
y3 ON m2(b3a);
y4 ON m2(b4a);
y5 ON m2(b5a);

y1 y2 y3 y4 y5 ON x1; ! all unmediated effects

MODEL CONSTRAINT: ! section for computing indirect effects for each DV
NEW(cross1); ! creates a new term for the cross-level mediation on DV1
cross1= a2*b1; ! identifies the indirect effect via within-state SDO on DV1
NEW(cross2); ! as above for all the other DVs
cross2=a2*b2;
NEW(cross3);
cross3=a2*b3;
NEW(cross4);
cross4=a2*b4;
NEW(cross5);
cross5=a2*b5;

NEW(betw1); ! computes a new term for the between-level indirect effect on DV1
betw1=a2*b1a; ! computes the Between indirect effect on DV1
NEW(betw2); ! as above for all the other DVs
betw2=a2*b2a;
NEW(betw3);
betw3=a2*b3a;
NEW(betw4);

```
